# Supplementary material for: Learning Outcomes of Immersive Technologies in Health Care Student Education: Systematic Review of the Literature
Source: PubMed Central journal article supplement (PMC8848248; doi:10.2196/30082), 2022-02-01
Supplement: jmir_v24i2e30082_app1.pdf [file jmir_v24i2e30082_app1.pdf]

Comprehensive list of search terms developed for the search strategy. The search terms included were divided into four categories: “discipline”, “technology”, “education” and “academic”

| <b>Discipline</b> | <b>Technology</b>                 | <b>Education</b> | <b>Academic</b> |
|-------------------|-----------------------------------|------------------|-----------------|
| Medical           | Virtual Reality                   | Teaching         | Student         |
| Medicine          | Augmented Reality                 | Training         | Trainee         |
| Nurse             | Mixed Reality                     | Lecture          |                 |
| Nursing           | Immersive Technology              | Pedagogy         |                 |
| Midwifery         | Imaging                           | Education        |                 |
| Midwifery         | Three dimensional                 | Learning         |                 |
| Midwives          | Computer Simulation               | Tutor            |                 |
|                   | Information Technology            | Lecturing        |                 |
|                   | Educational Technology            | Skill            |                 |
|                   | High-fidelity Simulation Training |                  |                 |
|                   | Technology                        |                  |                 |
|                   | Simulation                        |                  |                 |
|                   | User-computer Interface           |                  |                 |
|                   | Computer Simulation               |                  |                 |
|                   | Computer Assisted                 |                  |                 |
