# Supplementary material for: Learning Outcomes of Immersive Technologies in Health Care Student Education: Systematic Review of the Literature
Source: PubMed Central journal article supplement (PMC8848248; doi:10.2196/30082), 2022-02-01
Supplement: jmir_v24i2e30082_app3.pdf [file jmir_v24i2e30082_app3.pdf]

MERSQI domain and item scores for 29 studies

| Domain                                   | Item (score)                                       | MERSQI<br>Average<br>Score | SD  | Mean<br>(domain) | SD<br>(Domain) | N<br>Studies | %   |
|------------------------------------------|----------------------------------------------------|----------------------------|-----|------------------|----------------|--------------|-----|
| <b>Study design</b>                      | 1. Study design                                    |                            |     | 1                | 0              |              |     |
|                                          | Randomised controlled trial (3)                    | 3                          | 0   |                  |                | 29           | 100 |
|                                          | Nonrandomised 2 group (2)                          | 0                          | 0   |                  |                | 0            | 0   |
|                                          | Single group pre-test and post-test only (1)       | 0                          | 0   |                  |                | 0            | 0   |
| <b>Sampling</b>                          | 2. No. of institutions studied                     |                            |     | 0.3              | 0.15           |              |     |
|                                          | 3 institutions (1.5)                               | 0                          | 0   |                  |                | 0            | 0   |
|                                          | 2 institutions (1)                                 | 0.03                       | 0.2 |                  |                | 1            | 3   |
|                                          | 1 institution (0.5)                                | 0.48                       | 0.1 |                  |                | 28           | 97  |
|                                          | 3. Response rate %                                 |                            |     |                  |                |              |     |
|                                          | >75% (1.5)                                         | 1.4                        | 0.4 |                  |                | 27           | 93  |
|                                          | 50-74% (1)                                         | 0.07                       | 0.3 |                  |                | 2            | 7   |
| <50% or not reported (0.5)               | 0                                                  | 0                          |     |                  | 0              | 0            |     |
| <b>Type of data</b>                      | 4. type of data                                    |                            |     | 0.5              | 0              |              |     |
|                                          | Assessment by participants (1)                     | 1                          | 0   |                  |                | 29           | 100 |
|                                          | Objective measurement (3)                          | 0                          | 0   |                  |                | 0            | 0   |
| <b>Validity of evaluation instrument</b> | 5. Internal structure                              |                            |     | 0.3              | 0.27           |              |     |
|                                          | Not reported (0)                                   | 0                          | 0   |                  |                | 12           | 41  |
|                                          | Reported (1)                                       | 0.59                       | 0.5 |                  |                | 17           | 59  |
|                                          | 6. Content                                         |                            |     |                  |                |              |     |
|                                          | Not reported (0)                                   | 0                          | 0   |                  |                | 11           | 38  |
|                                          | Reported (1)                                       | 0.62                       | 0.5 |                  |                | 18           | 62  |
|                                          | 7. Relationships to other variables                |                            |     |                  |                |              |     |
| Not reported (0)                         | 0                                                  | 0                          |     |                  | 20             | 69           |     |
| Reported (1)                             | 0.31                                               | 0.5                        |     |                  | 9              | 31           |     |
| <b>Data analysis</b>                     | 8. Appropriateness of analysis                     |                            |     | 0.7              | 0.46           |              |     |
|                                          | Appropriate for study design, (1)                  | 1                          | 0   |                  |                | 29           | 100 |
|                                          | Inappropriate for study design or type of data (0) | 0                          | 0   |                  |                | 0            | 0   |
|                                          | 9. Complexity of analysis                          |                            |     |                  |                |              |     |
|                                          | Beyond descriptive analysis (2)                    | 1.31                       | 1   |                  |                | 19           | 65  |
| Descriptive analysis only (1)            | 0.34                                               | 0.5                        |     |                  | 10             | 34           |     |
| <b>Outcomes</b>                          | 10. Outcomes                                       |                            |     | 0.6              | 0.21           |              |     |
|                                          | Satisfaction, attitudes, perceptions, opinions (1) | 0.9                        | 0.3 |                  |                | 26           | 90  |
|                                          | Knowledge, Skills (1.5)                            | 1.45                       | 0.3 |                  |                | 28           | 97  |
|                                          | Behaviours (2)                                     | 0.14                       | 0.5 |                  |                | 2            | 7   |
|                                          | Patient/health care outcome (3)                    | 0                          | 0   |                  |                | 0            | 0   |
